# Supplementary material for: GDF10 blocks hepatic PPARγ activation to protect against diet-induced liver injury
Source: PubMed Central journal article supplement — Mol Metab. 2019 Jun 28;27:62–74. doi: 10.1016/j.molmet.2019.06.021 (PMC6717799; doi:10.1016/j.molmet.2019.06.021), 2019-06-28

## Supplemental Material

### GDF10 blocks hepatic PPAR $\gamma$ activation to protect against diet-induced liver injury

*Khrystyna Platko*<sup>1\*</sup>, *Paul F. Lebeau*<sup>1\*</sup>, *Jae Hyun Byun*<sup>1</sup>, *Samantha V. Poon*<sup>1</sup>, *Emily A. Day*<sup>2</sup>,  
*Melissa E. MacDonald*<sup>1</sup>, *Nicholas Holzapfel*<sup>1</sup>, *Aurora Mejia-Benitez*<sup>1</sup>, *Kenneth N. Maclean*<sup>3</sup>,  
*Joan C. Krepinsky*<sup>1</sup> and *Richard C. Austin*<sup>1,†</sup>

**Table 1: List of antibodies used for IHC and immunoblotting.**

| Antibody       | Manufacturer and Product Number   | Application | Dilution            |
|----------------|-----------------------------------|-------------|---------------------|
| C/EBP          | sc-7273, Santa Cruz Biotechnology | IHC         | 1:50, HIER          |
| CD36           | NB400-144, Novus Biologicals      | IHC         | 1:100, no retrieval |
| GRP78          | sc-1050, Santa Cruz Biotechnology | IHC         | 1:40, no retrieval  |
| GRP94          | ADI-SPA-850, Enzo Life Sciences   | IHC         | 1:100, HIER         |
| Perilipin      | ab3526, Abcam                     | IHC         | 1:100, HIER         |
| PPAR $\gamma$  | sc-7273, Santa Cruz Biotechnology | IHC         | 1:50, HIER          |
| pPERK          | ab192591, Abcam                   | IHC         | 1:50, HIER          |
| GAPDH          | 2118, Cell Signaling Technology   | IB          | 1:1000              |
| GDF10          | 16630, Novus Biologicals          | IHC, IB     | 1:50, 1:1000        |
| Histone H3     | 9715, Cell Signaling Technology   | IB          | 1:1000              |
| C/EBP $\alpha$ | sc-150, Santa Cruz Biotechnology  | IF, IB      | 1:50, 1:200         |
| PPAR $\gamma$  | sc-7273, Santa Cruz Biotechnology | IF, IB      | 1:50, 1:200         |
| Smad2/3        | 3102, Cell Signaling Technology   | IB          | 1:500               |

|                   |                                  |    |       |
|-------------------|----------------------------------|----|-------|
| Phospho-Smad2/3   | 8828, Cell Signaling Technology  | IB | 1:500 |
| Smad1/5/9         | 12656, Cell Signaling Technology | IB | 1:500 |
| Phospho-Smad1/5/9 | 13820, Cell Signaling Technology | IB | 1:500 |

IB, immunoblot; IHC, immunohistochemical staining; IF, immunofluorescence; HIER, heat-induced epitope retrieval

**Table 2: List of primers used for quantitative real time PCR**

| Gene    | Species | Forward                 | Reverse                     |
|---------|---------|-------------------------|-----------------------------|
| ANGPTL4 | Mouse   | CATCCTGGGACGAGATGAACT   | TGACAAGCGTTACCACAGGC        |
| ACOX1   | Mouse   | GGGAGTGCTACGGGTACATG    | CCGATATCCCCAACAGTGATG       |
| ACOT2   | Mouse   | GTTGTGCCAACAGGATTGGAA   | GCTCAGCGTCGCATTTGTC         |
| Acadm   | Mouse   | AGGGTTTAGTTTTGAGTTGACGG | CCCCGCTTTTGTTCATATCCG       |
| ATF4    | Mouse   | ATGGCCGGCTATGGATGAT     | CGAAGTCAAACCTCTTTCAGATCCATT |
| BBC3    | Mouse   | TGTGGAGGAGGAGGAGTGG     | TGCTGCTCTTCTTGCTCCG         |
| CEBPa   | Mouse   | CAAGAACAGCAACGAGTACCG   | GTCACTGGTCAACTCCAGCAC       |
| CD36    | Mouse   | GATGACGTGGCAAAGAACAG    | TCCTCGGGGTCTGAGTTAT         |
| CHOP    | Mouse   | CTGCCTTTCACCTTGAGAC     | CGTTTCTGGGGATGAGATA         |
| Casp3   | Mouse   | CCTCAGAGAGACATTCATGG    | GCAGTAGTCGCCTCTGAAGA        |
| Casp7   | Mouse   | GGACCGAGGGCCCACTTATC    | TCGCTTTGTCTGAAGTTCTTGTT     |
| CRCT2   | Mouse   | ATGAACCCTAACCCCAAGAC    | CGTTCTCCTCAATAGCAGGGA       |
| FOXO1   | Mouse   | CCCAGGCCGGAGTTTAACC     | GTTGCTCATAAAGTCGGTGCT       |
| FGF21   | Mouse   | AGATCAGGGAGGATGGAACA    | TCAAAGTGAGGCGATCCATA        |
| FN1     | Mouse   | CGAGGTGACAGAGACCACCA    | CTGGGAGTCAAGCCAGACACA       |
| FSP27   | Mouse   | ATGGACTACGCCATGAAGTCT   | CGGTGCTAACACGACAGGG         |
| FATP5   | Mouse   | GAATCGGGAGGCAGAGAACT    | AGCGGGTCATACAAGTGAGC        |
| GRP78   | Mouse   | GTCCTGCATCATCAGCAAAG    | GGTAGCCACATACTGAACACC       |
| GRP94   | Mouse   | GATGGTCTGGCAACATGGAG    | CGCCTTGGTGTCTGGTAGAA        |
| GDF10   | Mouse   | AATGATCGACAAAAGCCTGT    | CTTGCAGAATACCTCACGAGC       |

|           |       |                                 |                                 |
|-----------|-------|---------------------------------|---------------------------------|
| IRE1a     | Mouse | TGAAACACCCCTTCTTCTGG            | CCTCCTTTTCTATTCCGGTCACTT        |
| Il1b      | Mouse | GCACTACAGGCTCCGAGATGAAC         | TTGTGCTTGCTTGGTTCTCCTTGT        |
| LPL       | Mouse | GGGCTCTGCCTGAGTTGTAG            | AGAAATTTTGAAGGCCTGGT            |
| PPARa     | Mouse | GAAGGGCACACGCGTGCGAGTTTT<br>CAG | GAAGGGCACACGCGTGCGAGTTTT<br>CAG |
| Perilipin | Mouse | CTGTGTGCAATGCCTATGAG<br>A       | CTGGAGGGTATTGAAGAGCC<br>G       |
| PGC1b     | Mouse | TCCTGTAAAAGCCCGGAGTA<br>T       | GCTCTGGTAGGGGCAGTGA             |
| PDK4      | Mouse | AGGGAGGTCGAGCTGTTCTC            | GGAGTGTTCACTAAGCGGTCA           |
| PARP1     | Mouse | GGAAAGGGATCTACTTTGCCG           | TCGGGTCTCCCTGAGATGTG            |
| PCK1      | Mouse | CTGCATAACGGTCTGGACTTC           | CAGCAACTGCCGTACTCC              |
| sXBP1     | Mouse | GAGTCCGCAGCAGGTG                | GTGTCAGAGTCCATGGGA              |
| STAT3     | Mouse | CACCTTGGATTGAGAGTCAAGAC         | AGGAATCGGCTATATTGCTGGT          |
| TNFa      | Mouse | CATGAGCACAGAAAGCATGATCCG        | AAGCAGGAATGAGAAGAGGCTGAG        |
| TGF beta  | Mouse | CAACAATTCCTGGCGTTACCTTGG        | GAAAGCCCTGTATTCCGTCTCCTT        |

## Figure legends

**Fig. S1 GDF10 treatment reduces cytotoxicity in response to TG and TM.** (A) ORO staining and isopropanol extract quantification of HepG2 cells treated with TG (100 nM), PA (200  $\mu$ M) and rhGDF10 (250 ng/mL) for 24 hours. (B) LDH release assay in the medium from Huh7 cells treated with TG (100 nM) and TM (2  $\mu$ g/mL). Scale bar, 50  $\mu$ m. All data are shown as the mean  $\pm$  S.D. \*,  $p < 0.05$  by unpaired two-tailed Student's *t*-test or one-way ANOVA.

**Fig. S2 GDF10<sup>-/-</sup> exhibit a reduction in plasma Leptin.** Plasma content of circulating Leptin in wild type and GDF10<sup>-/-</sup> mice fed NCD (n=5). All data are shown as the mean  $\pm$  S.D. \*,  $p < 0.05$  by unpaired two-tailed Student's *t*-test.

**Fig. S3 GDF10 modulates PPAR $\gamma$  and C/EBP $\alpha$  nuclear abundance.** Immunofluorescent staining of PPAR $\gamma$  and C/EBP $\alpha$  in (A) HepG2 cells and (B) primary human hepatocytes treated with rhGDF10 or CGTZ. Scale bars, 50  $\mu$ m.

**Fig. S4 TGF $\beta$ R1 inhibition reduces CGTZ-mediated lipid droplet accumulation in HepG2 cells.** ORO staining in HepG2 cells treated with CGTZ (10  $\mu$ M), rhGDF10 (250 ng/mL) and IN1130 (100 nM). Scale bar, 50  $\mu$ m.

**Fig. S5 GDF10<sup>-/-</sup> mice exhibit increased hepatic fibrosis, apoptosis and gluconeogenesis. (A)** PSR staining in the livers of mice fed NCD or HFD. Real time PCR analysis of hepatic mRNA abundance of indicated genes involved in **(B)** apoptosis and **(C)** gluconeogenesis (n=5). Scale bars, 200  $\mu$ m. All data are shown as the mean  $\pm$  S.D. \*,  $p < 0.05$  by one-way ANOVA.

**Fig. S6. ER stress-inducing agent TM induces the expression of GDF10 in 3T3-L1 adipocytes.** Real time PCR analysis of GDF10 mRNA transcript levels in 3T3-L1 adipocytes treated with TM (2  $\mu$ g/ml) for 24 hours. All data are shown as the mean  $\pm$  S.D. \*,  $p < 0.05$  by unpaired two-tailed Student's  $t$ -test.

**A**

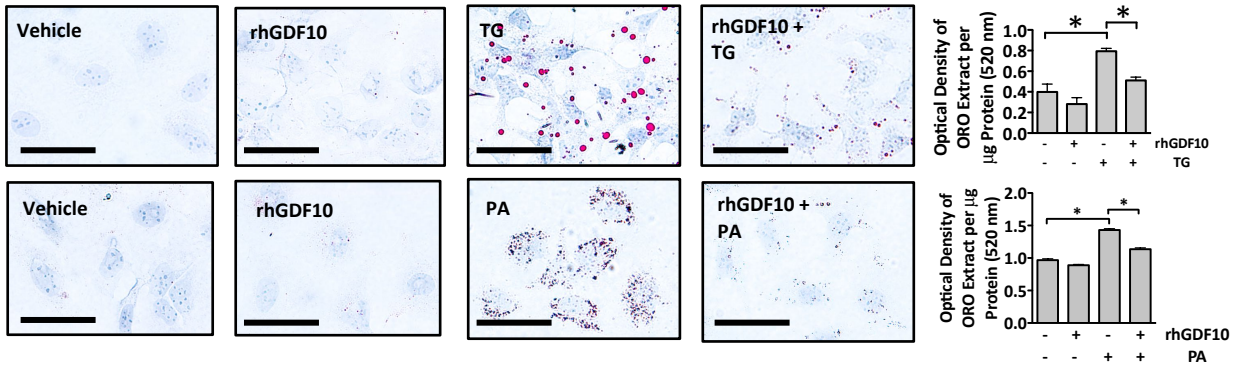

**B**

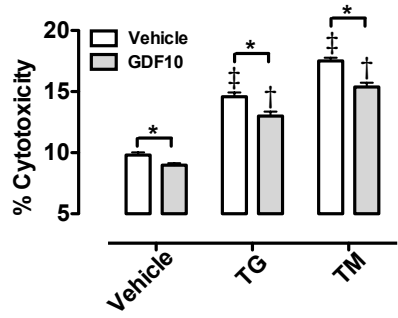

Figure S2.

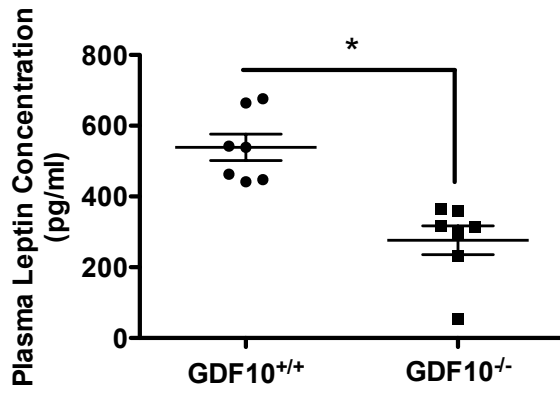

Figure S3.

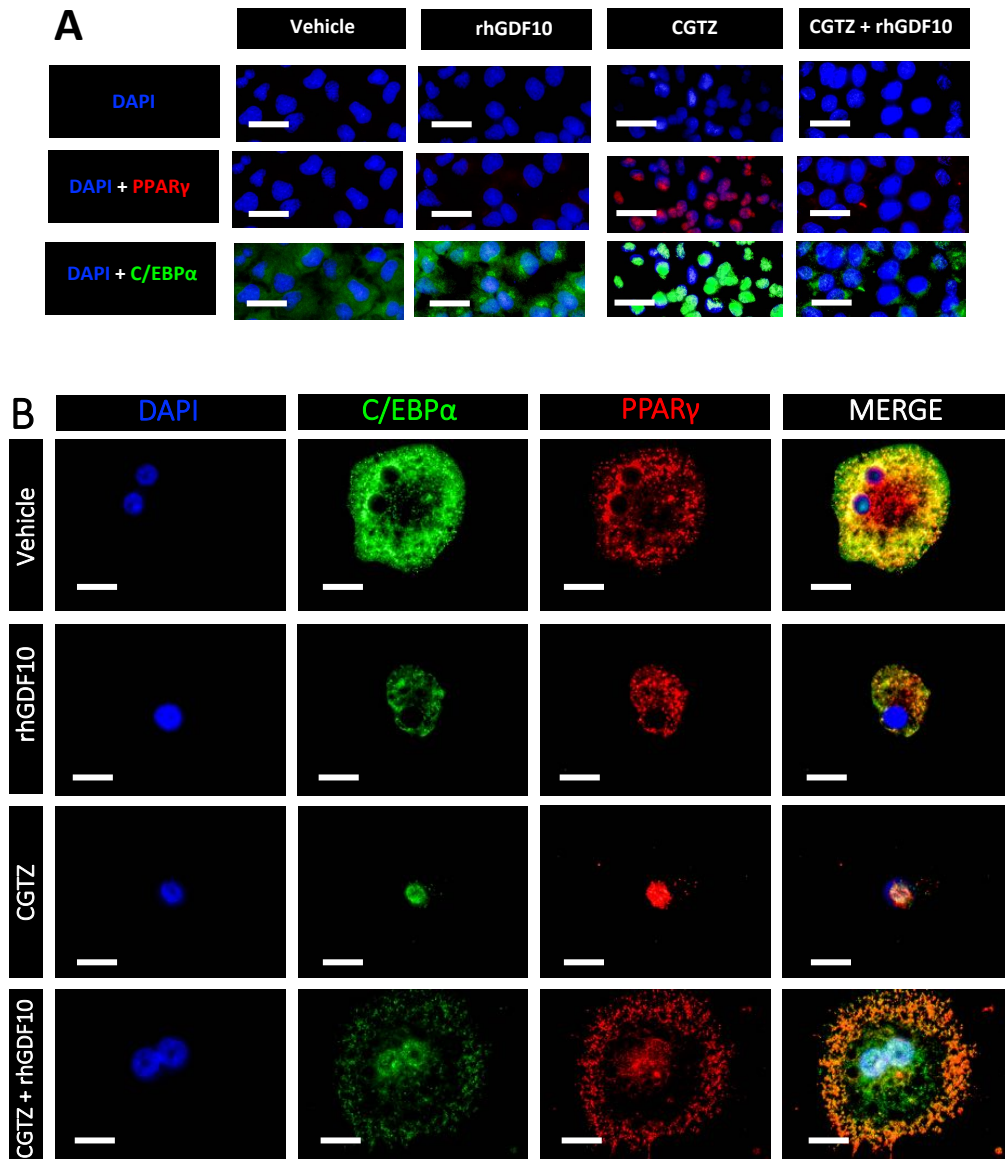

Figure S4.

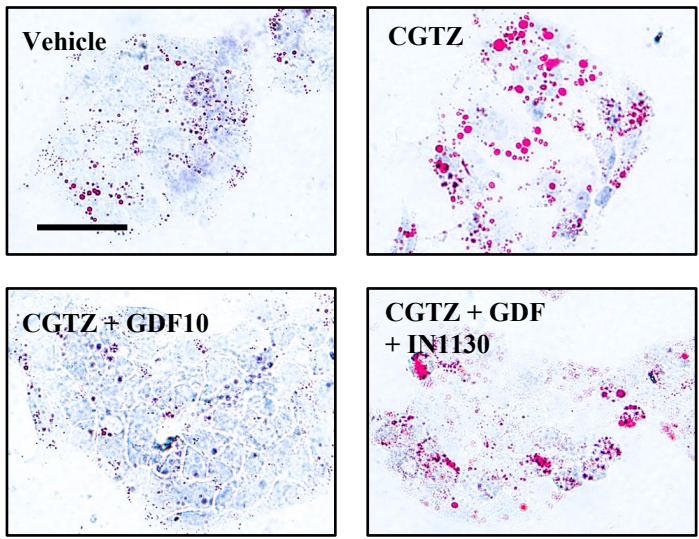



Figure S5.

GDF10<sup>+/+</sup> NCD   GDF10<sup>-/-</sup> NCD   GDF10<sup>+/+</sup> HFD   GDF10<sup>-/-</sup> HFD

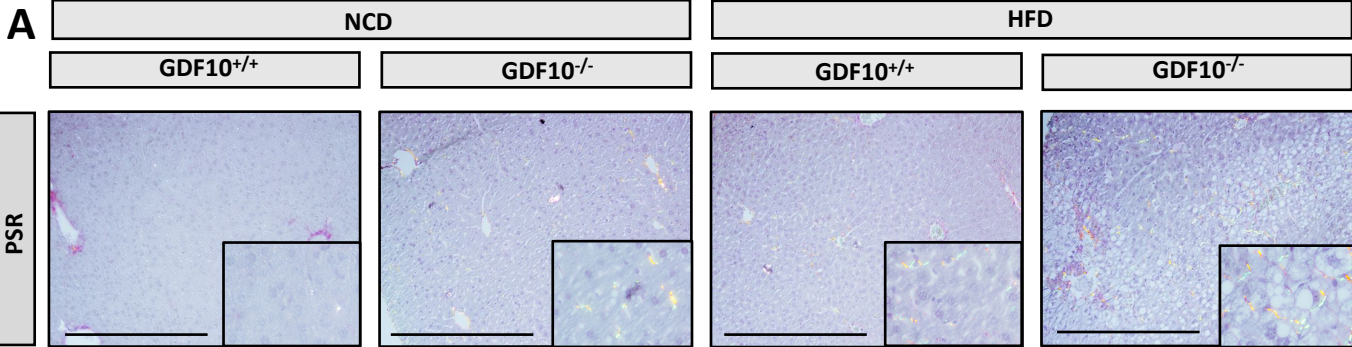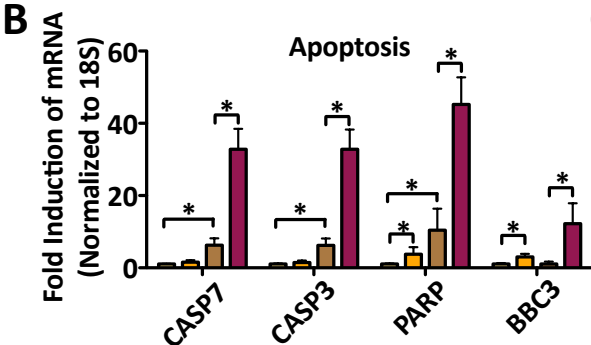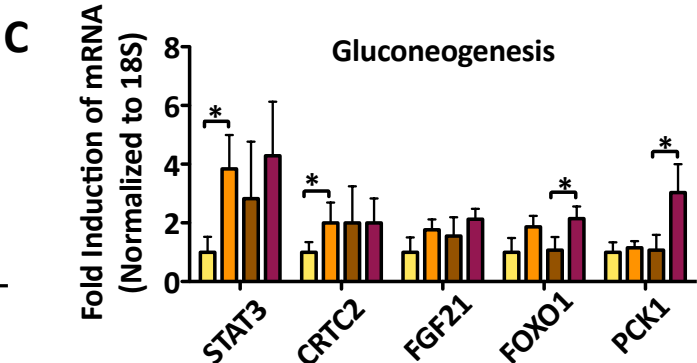

Figure S6.

A

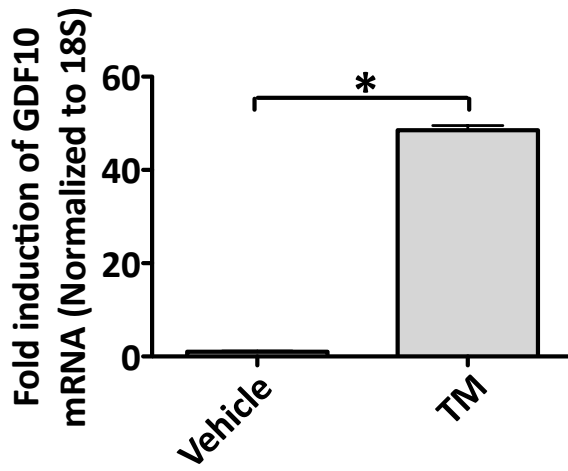

Supplement: mmc1.pdf [file mmc1.pdf]
